# Supplementary material for: Color-tunable persistent luminescence in oxyfluoride glass and glass ceramic containing Mn2+:α-Zn2SiO4 nanocrystals
Source: Royal Society of Chemistry journal article supplement (doi:10.1039/c6tc05340h), 2017-01-01
Supplement: c6tc05340h1.pdf [file c6tc05340h1.pdf]

**Supporting Information**

**Color-Tunable Persistent Luminescence in New  
Oxyfluoride Glass and Glass Ceramic Containing  
 $\text{Mn}^{2+}$ :  $\alpha$ - $\text{Zn}_2\text{SiO}_4$  Nanocrystals**

Tao Hu,<sup>ab</sup> Hang Lin,<sup>\*a</sup> Ju Xu,<sup>a</sup> Bo Wang,<sup>a</sup> Jiaomei Wang,<sup>a</sup> Yuansheng Wang<sup>\*a</sup>

<sup>a</sup> Key Laboratory of Design and Assembly of Functional Nanostructures, Fujian Institute of Research on the Structure of Matter, Chinese Academy of Sciences; University of Chinese Academy of Sciences, Fuzhou, Fujian, 350002 (P. R. China)

<sup>b</sup> College of Materials Science and Engineering, Fujian Normal University, Fuzhou, Fujian, 350007 (P. R. China)

---

\*E-mail: [lingh@fjirsm.ac.cn](mailto:lingh@fjirsm.ac.cn); Tel/Fax: +86-591-63179423

\*E-mail: [ywang@fjirsm.ac.cn](mailto:ywang@fjirsm.ac.cn); Tel/Fax: +86-591-63179438

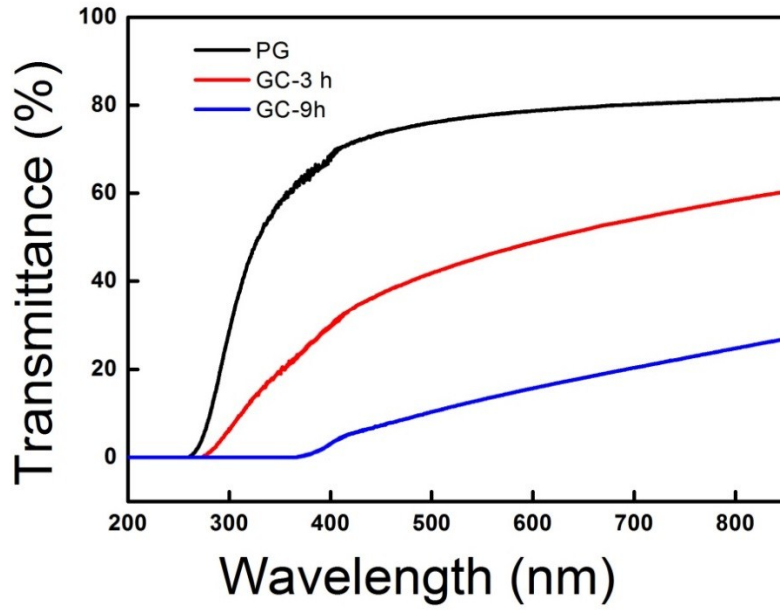

**Figure S1.** Transmittance spectra of the precursor glass (PG) and two representative glass ceramic (GC-3h, GC-9h) samples.

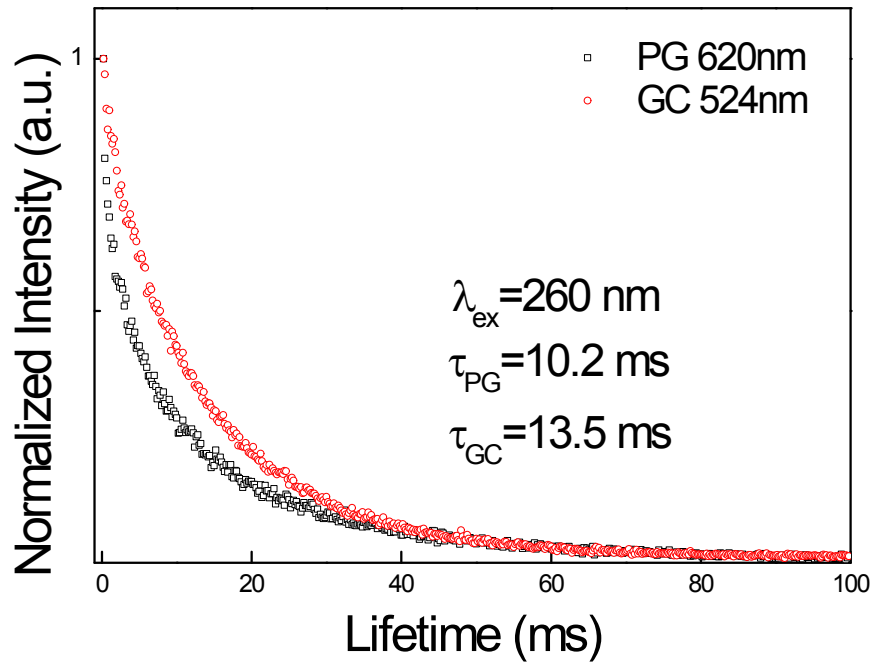

**Figure S2.** Luminescent decay curves of  $\text{Mn}^{2+}: {}^4\text{T}_{1g}(\text{G}) \rightarrow {}^6\text{A}_{1g}(\text{S})$  at 620 nm for PG and  $\text{Mn}^{2+}: {}^4\text{T}_1(\text{G}) \rightarrow {}^6\text{A}_1(\text{S})$  at 524 nm for GC-9h, under 260 nm excitation.

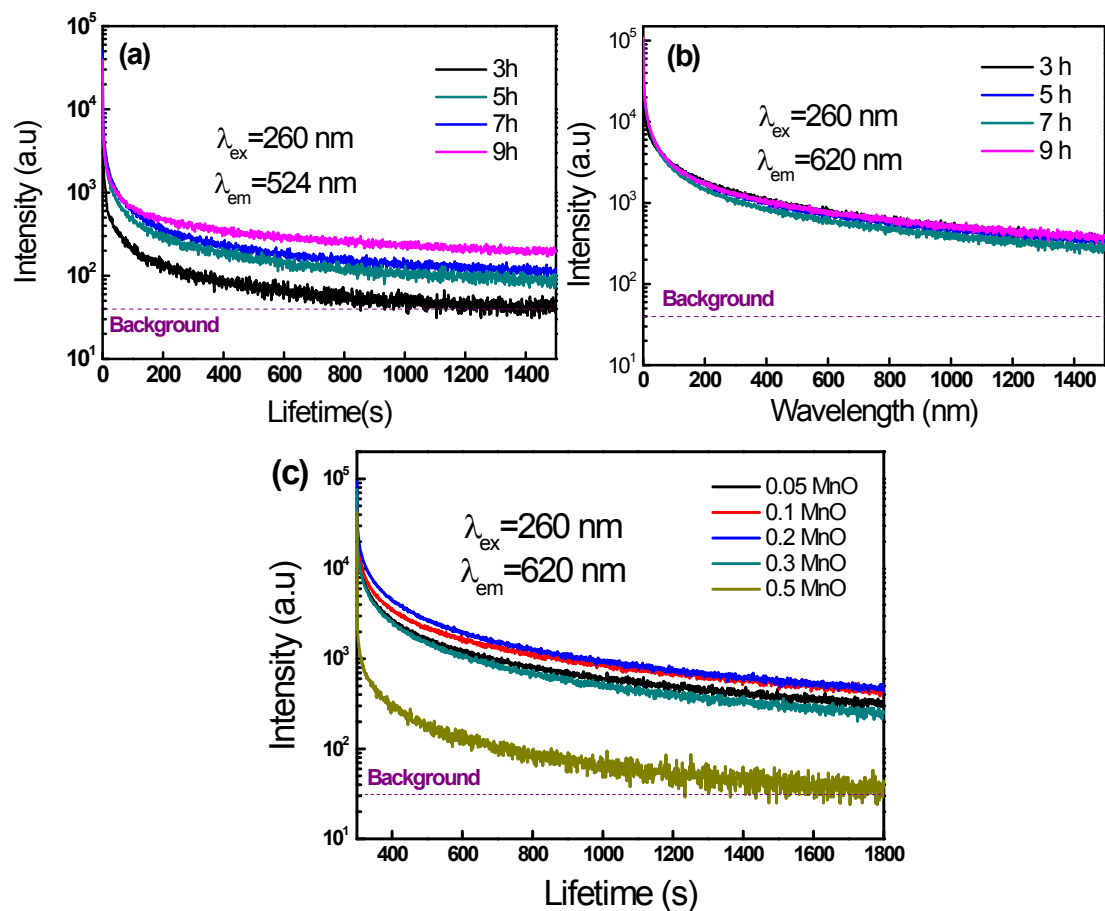

**Figure S3.** PersL decay curves by monitoring at (a) 524 nm and (b) 620 nm in the GC samples with different annealing durations. (c)  $Mn^{2+}$  doping concentration dependent persistent decay curves by monitoring at 620 nm in the PG samples.

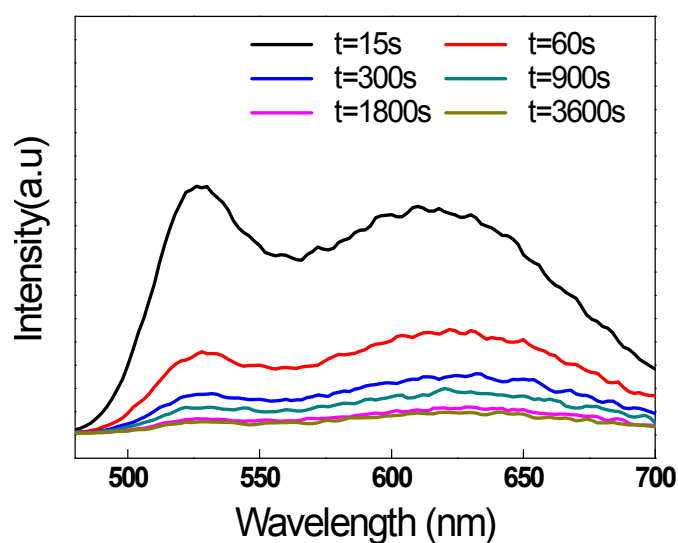

**Figure S4.** Persistent luminescence spectra of GC-7h sample at different time intervals (15-3600s) after ceasing the 260 nm excitation.

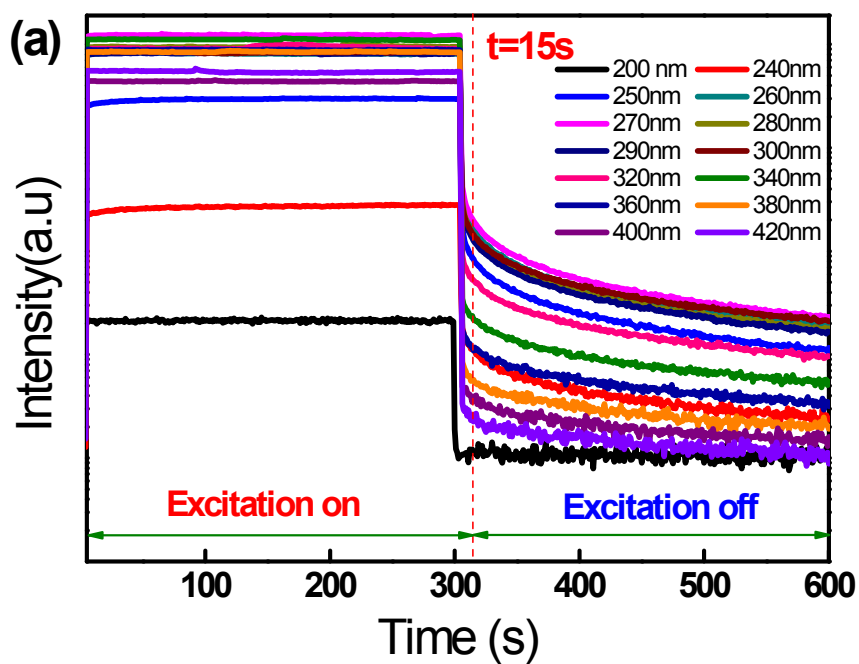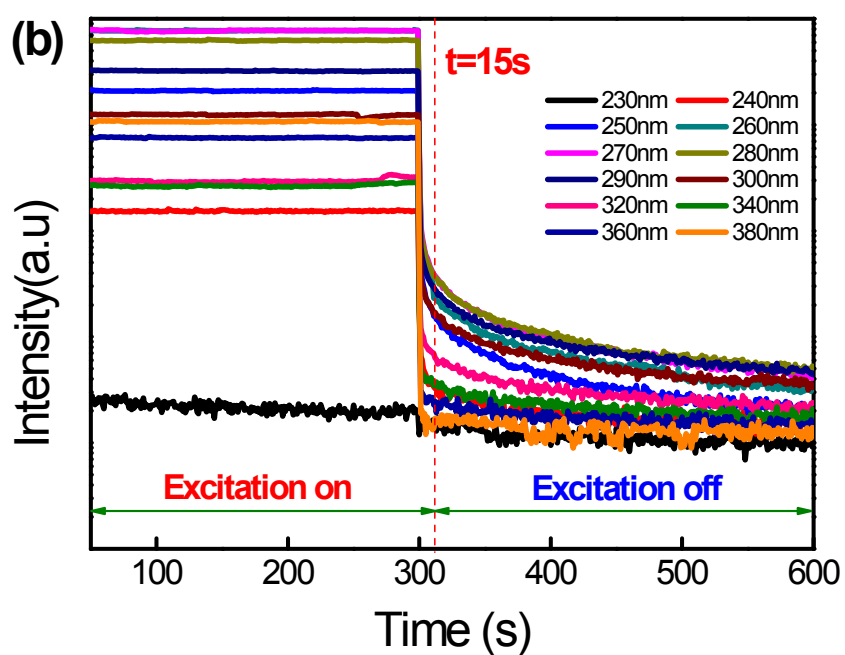

**Figure S5.** Persistent decay curves of the  $\text{Mn}^{2+}$  doped (a) PG and (b) GC samples excited at various wavelengths.

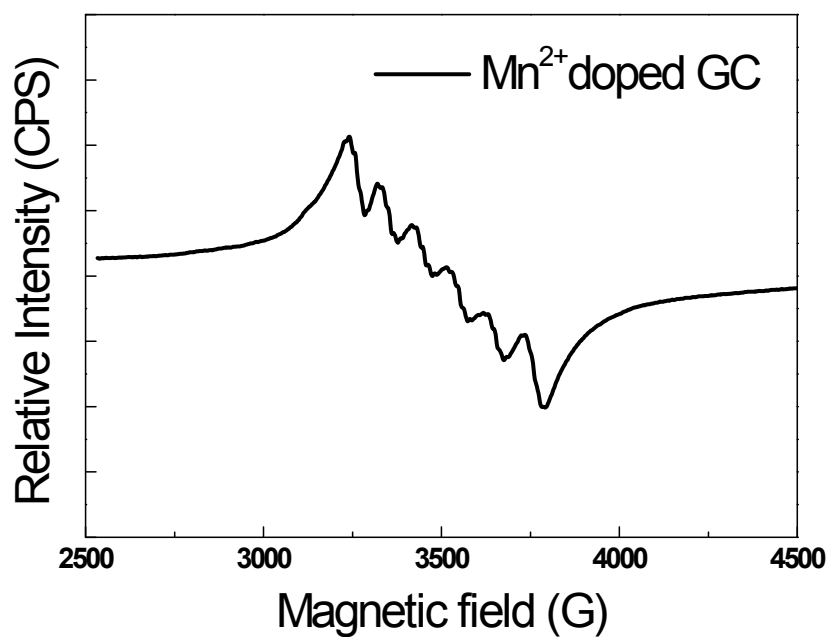

**Figure S6.** EPR spectrum of the Mn<sup>2+</sup> doped glass ceramic.

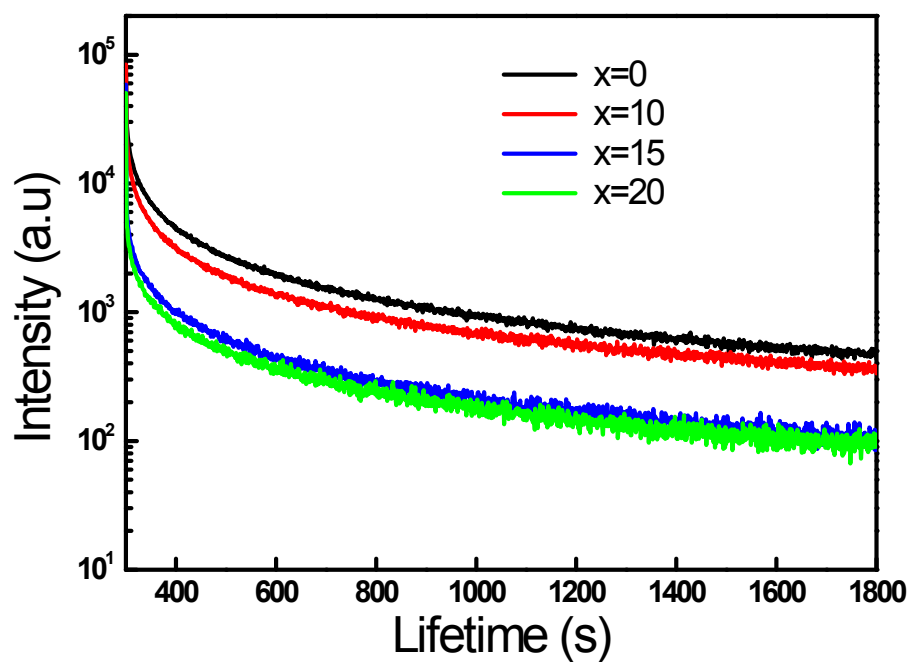

**Figure S7.** The composition dependent PersL decay curves in 55SiO<sub>2</sub>-20KF-(25-x)ZnF<sub>2</sub>-xZnO glasses by monitoring at 620 nm upon 260 nm excitation for 5 min.
